# Supplementary material for: The p53-Driven Anticancer Effect of Ribes fasciculatum Extract on AGS Gastric Cancer Cells
Source: MDPI journal article supplement (doi:10.3390/life12020303), 2022-02-17

# Original Images for Blots/Gels

This data is a raw image of Western blotting used in the manuscript.

Full unedited gel for Figure S4A

First, this is the original picture when the cells were treated at a concentration of 30 and 60  $\mu\text{g/mL}$  of *Ribes fasciculatum* Extract.

Figure S4A

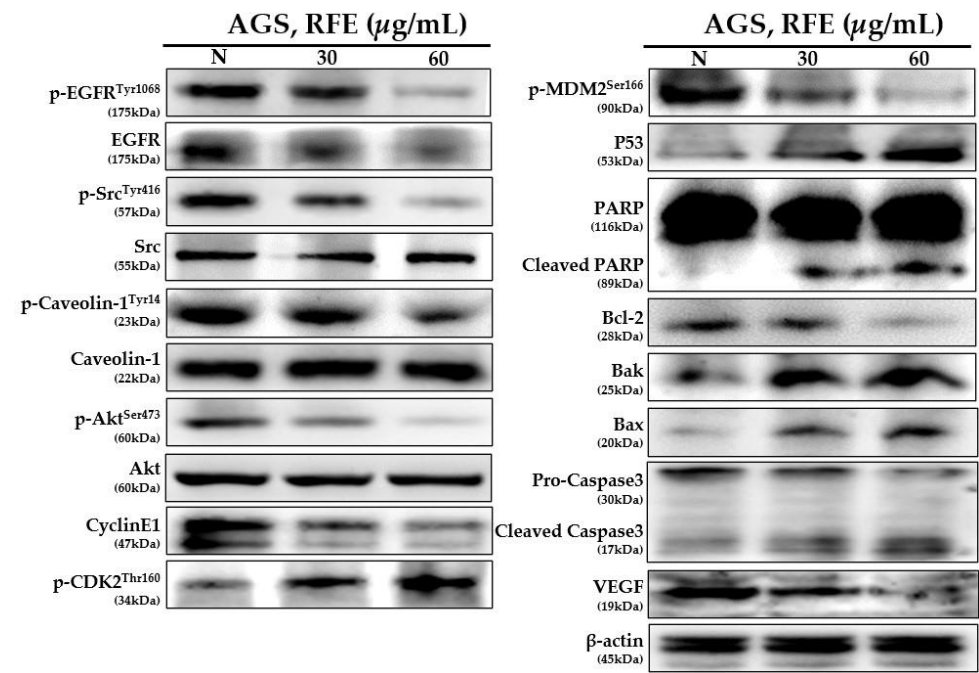

Full unedited gel for Figure S4A

**p-EGFR**

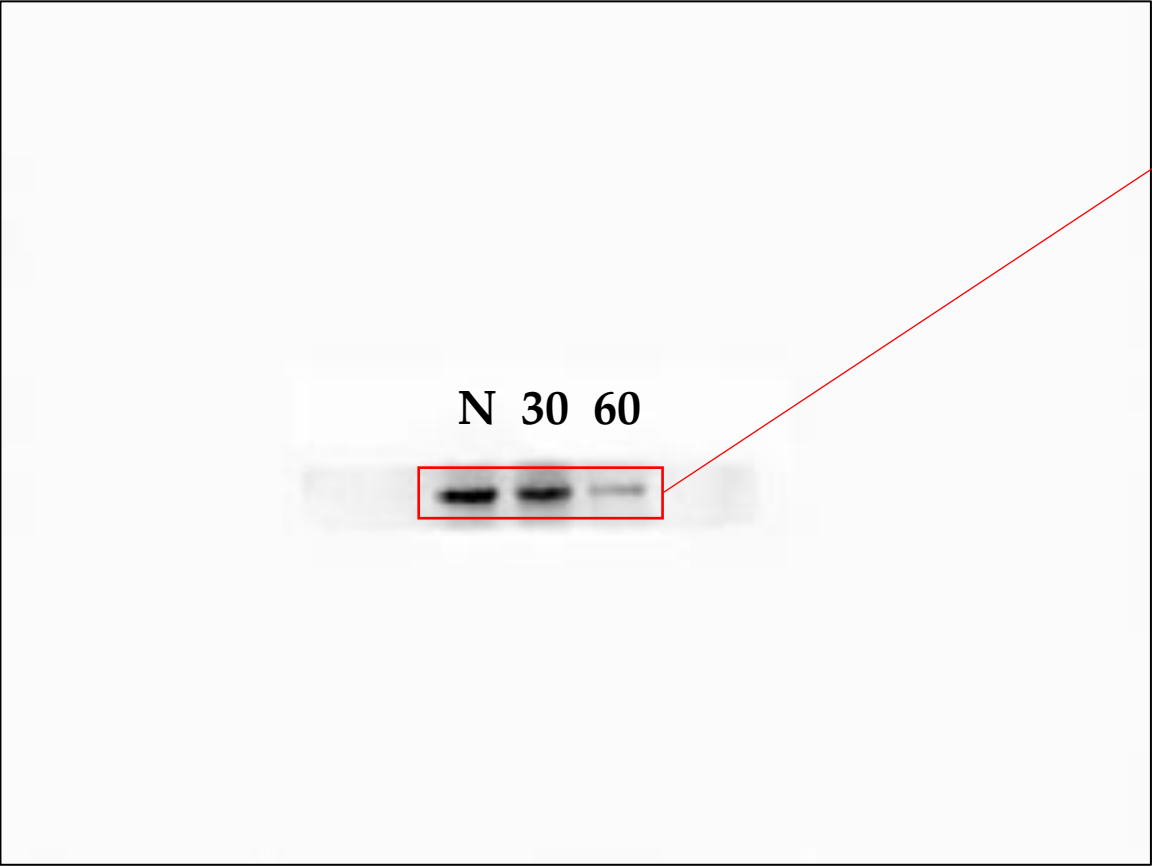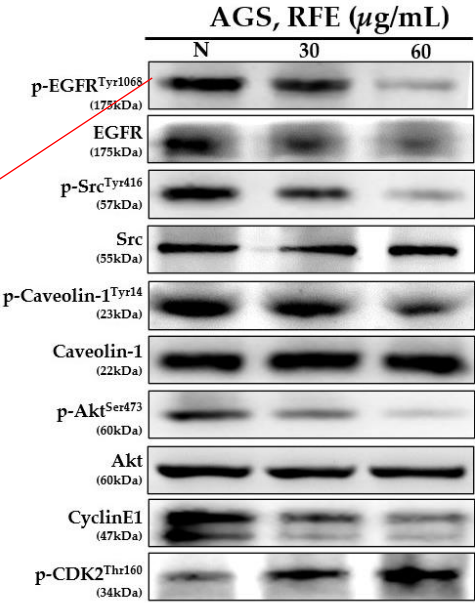

Full unedited gel for Figure S4A

EGFR

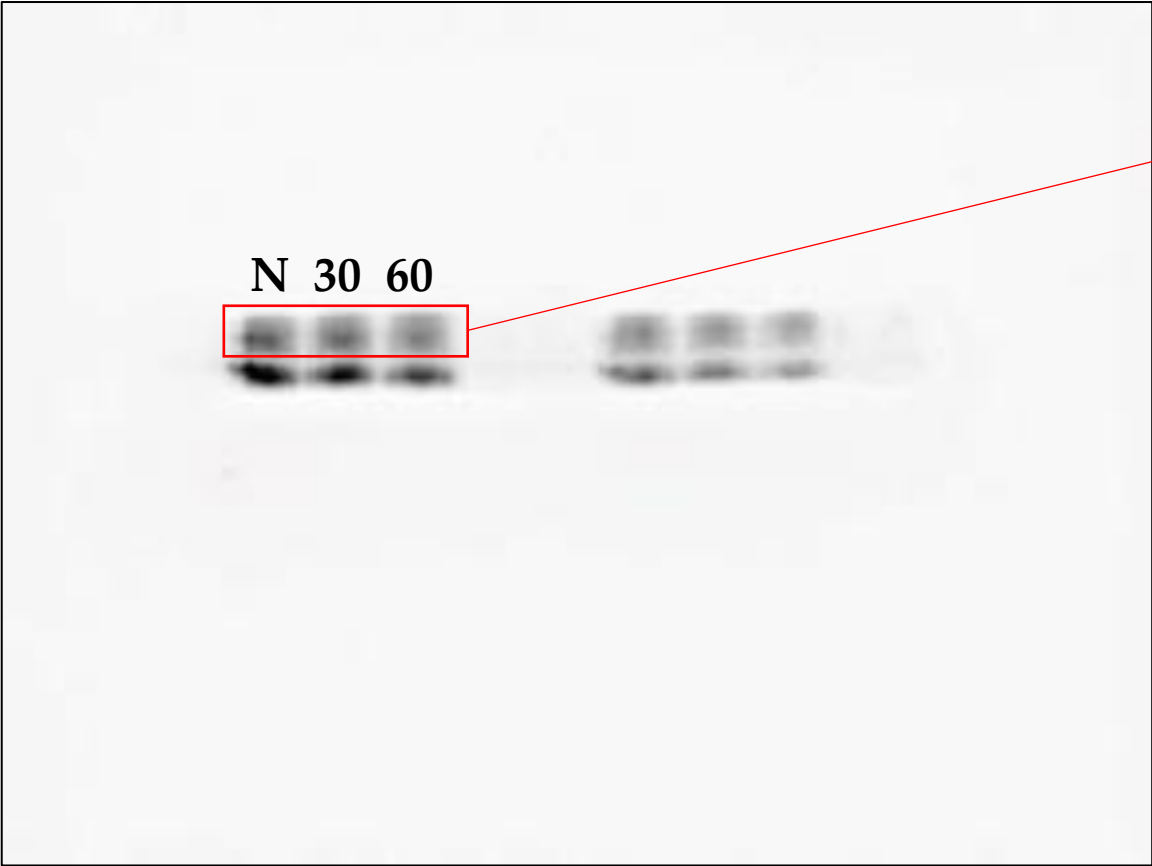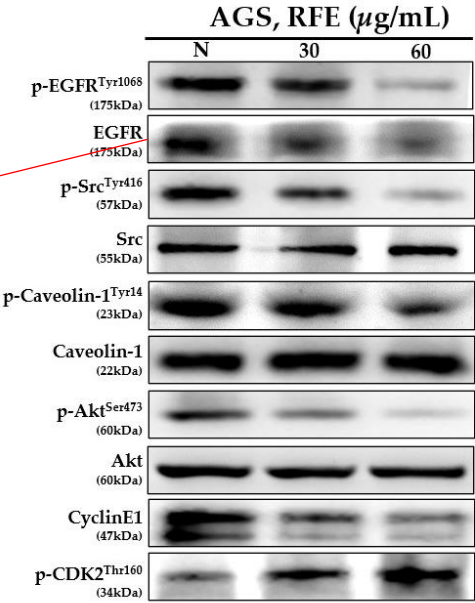

Full unedited gel for Figure S4A

**p-Src**

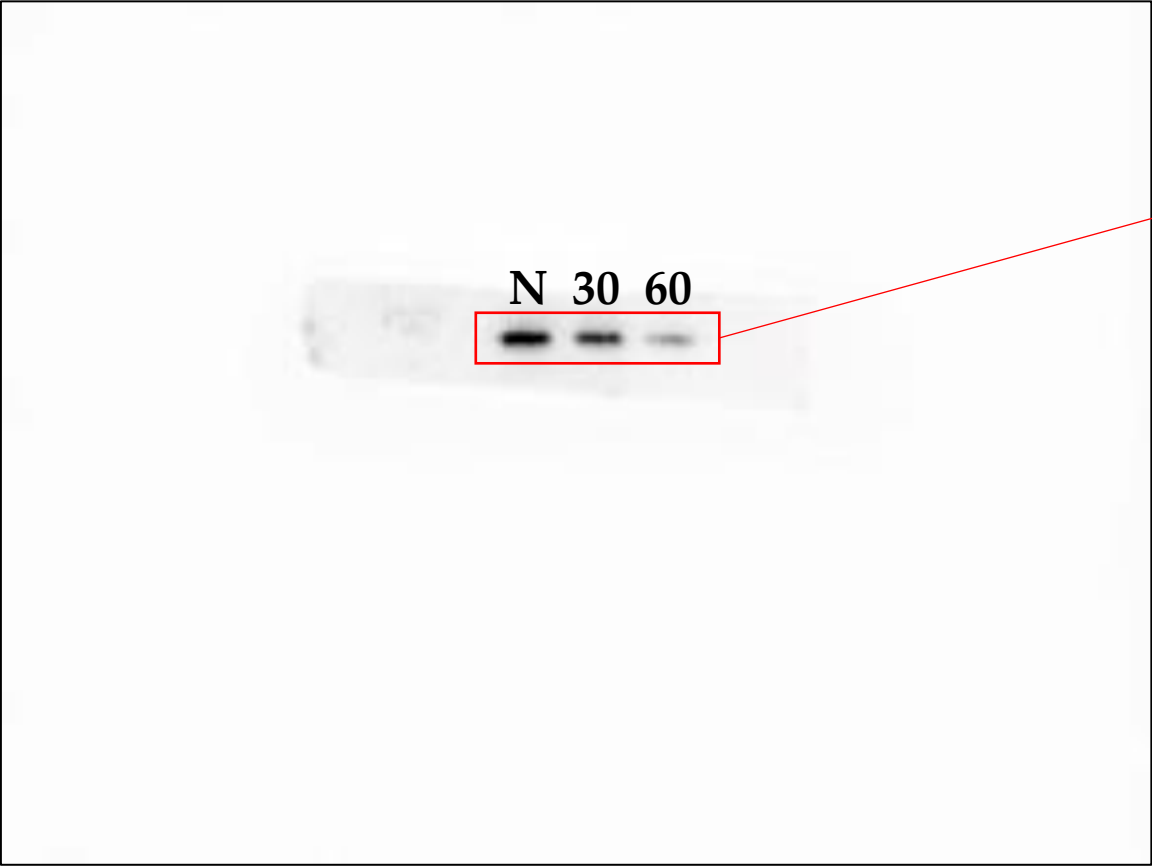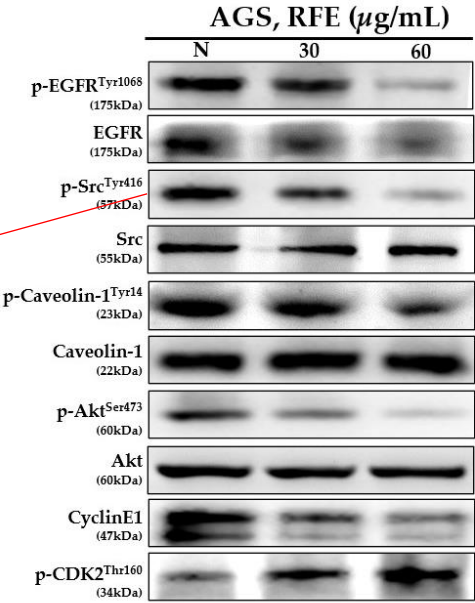

Full unedited gel for Figure S4A

Src

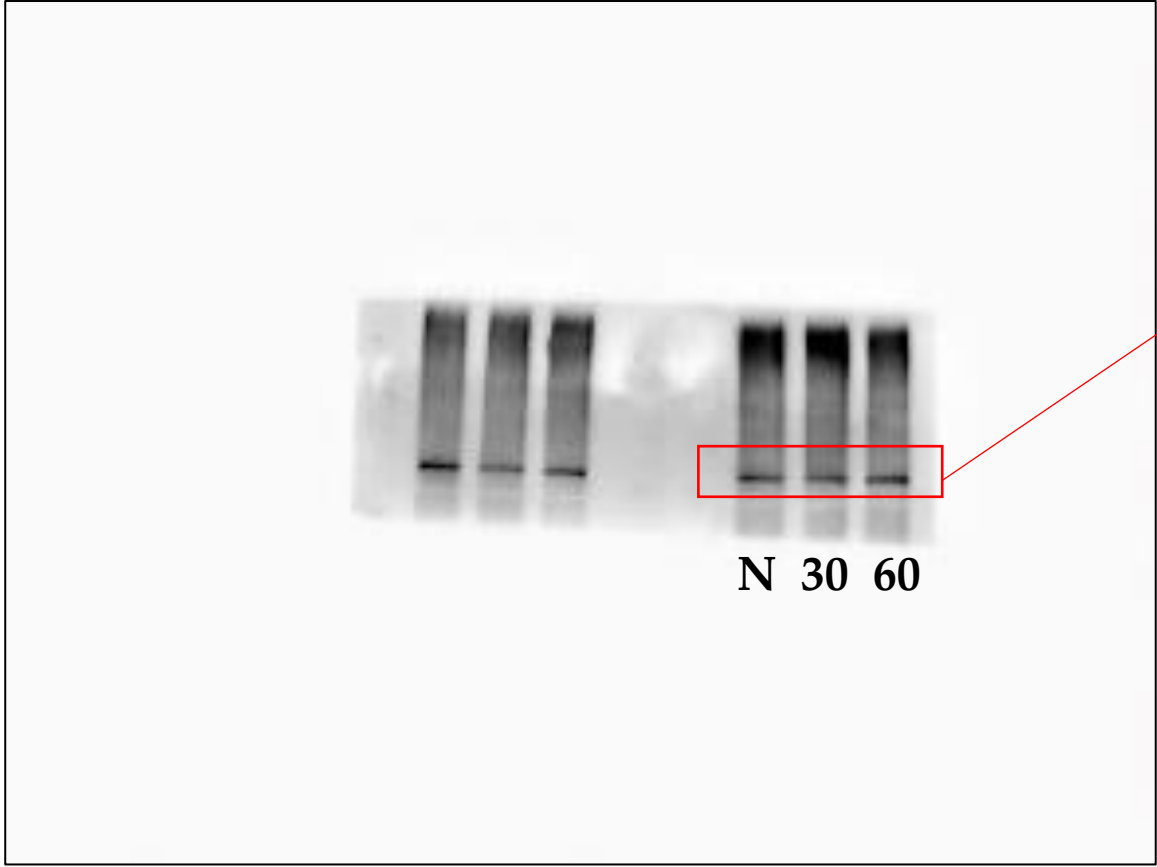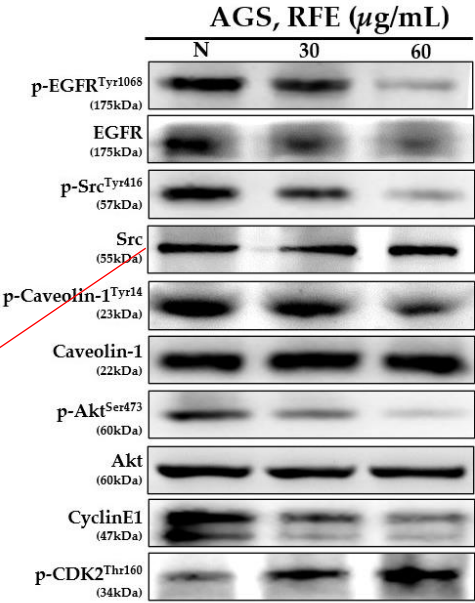

Full unedited gel for Figure S4A

**p-Caveolin-1**

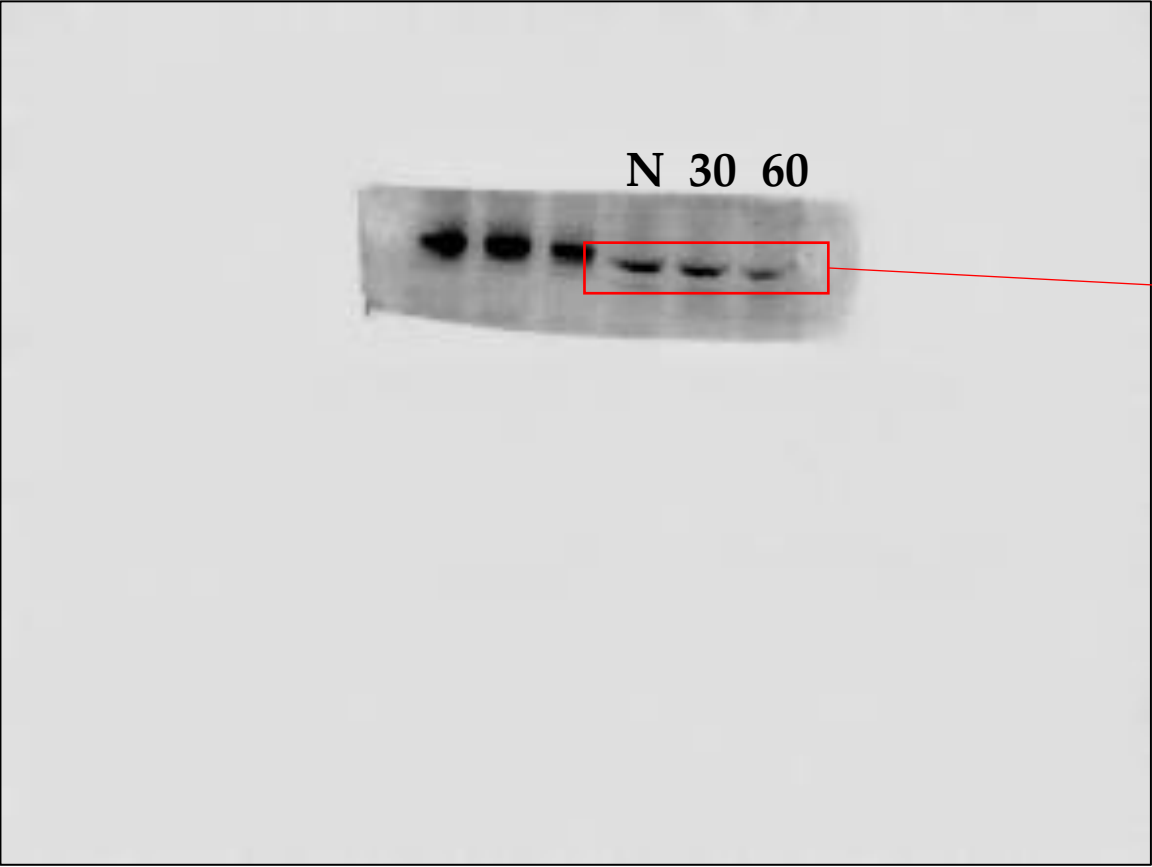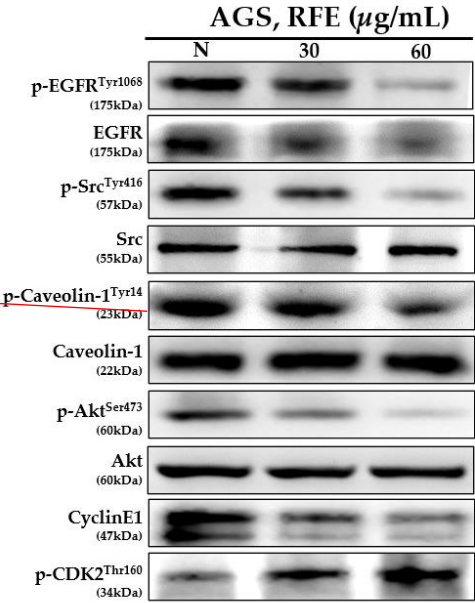

Full unedited gel for Figure S4A

**Caveolin-1**

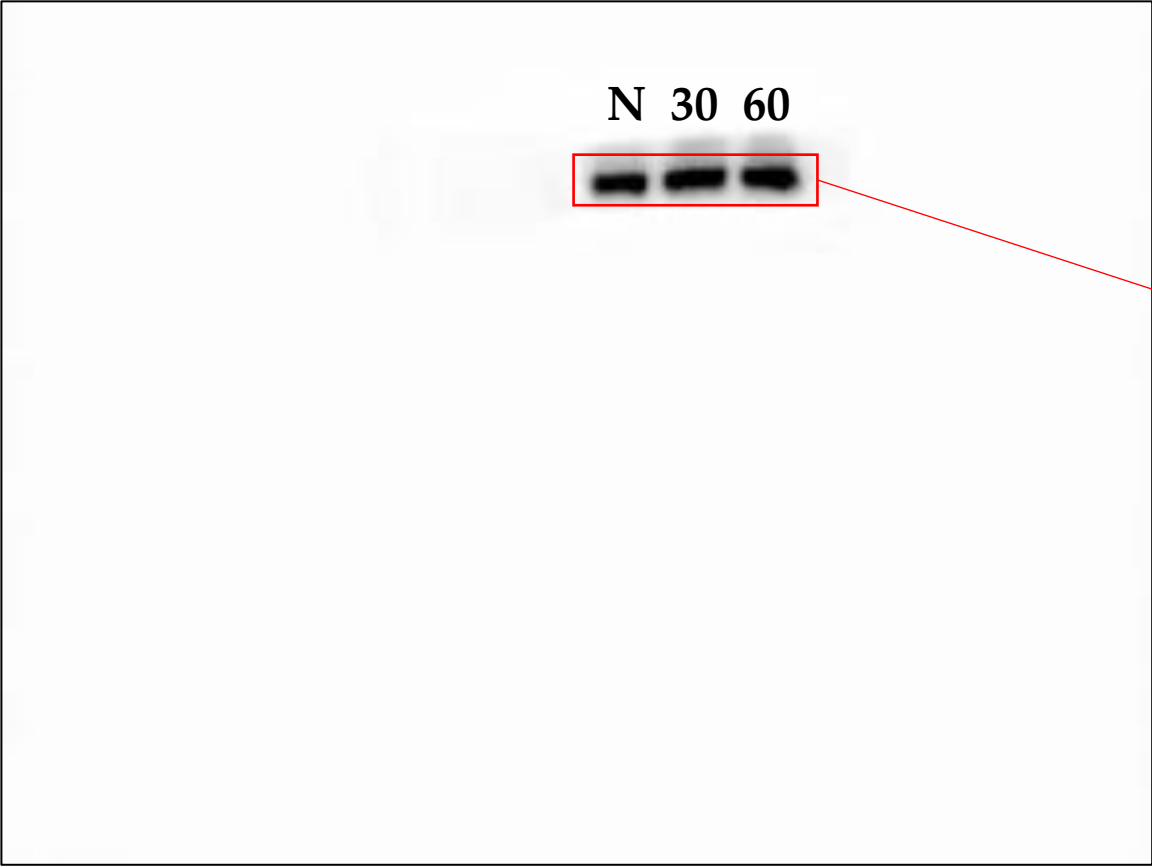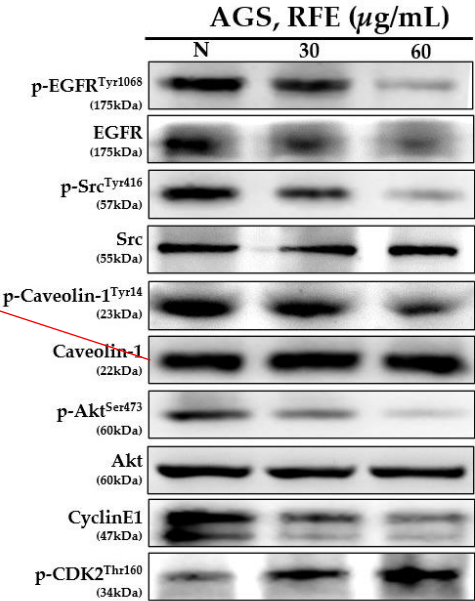



Full unedited gel for Figure S4A

**p-Akt**

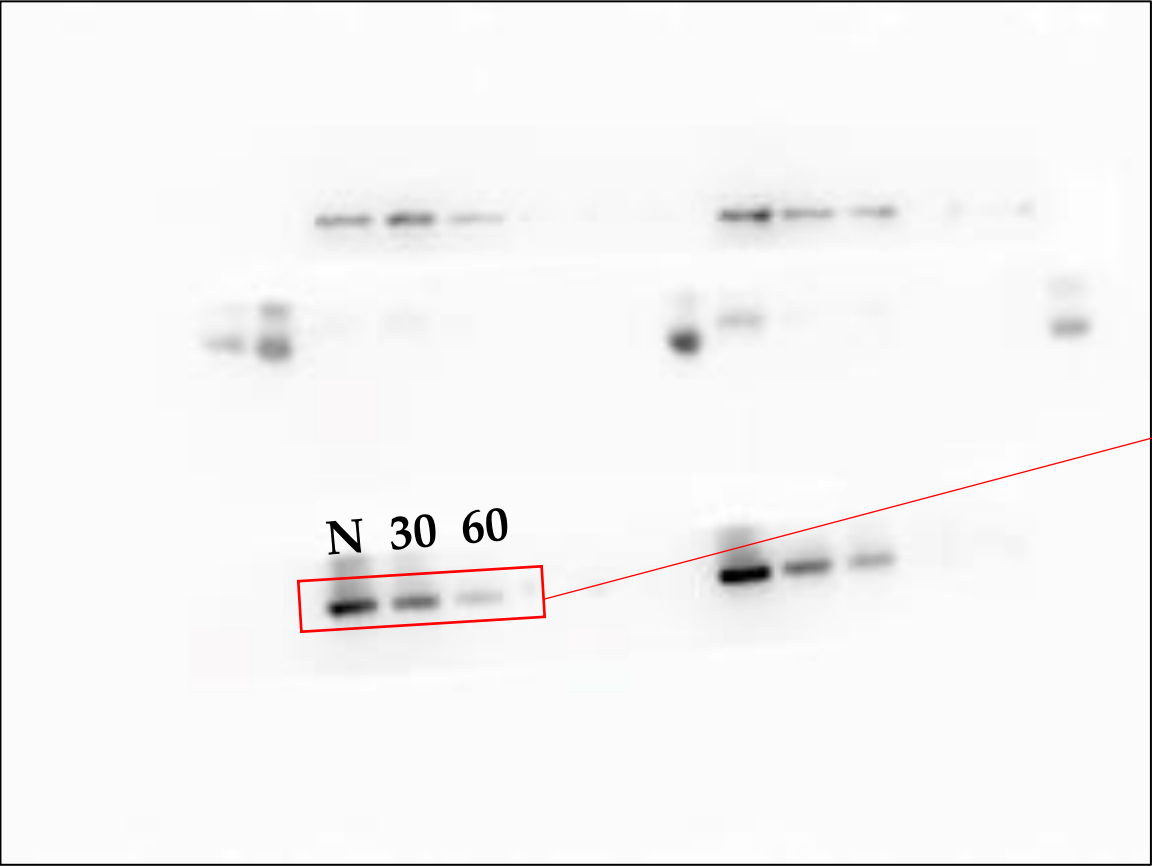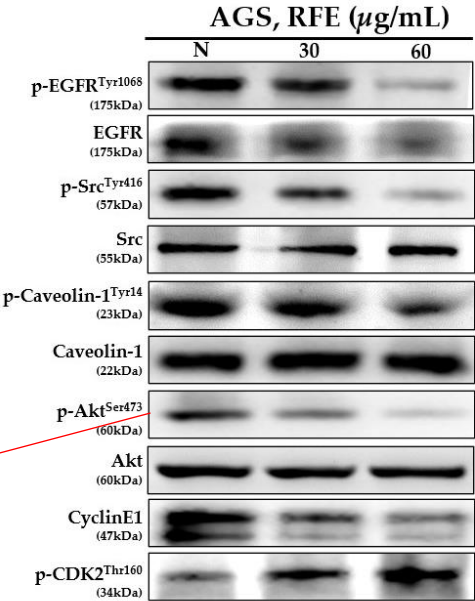

Full unedited gel for Figure S4A

**Akt**

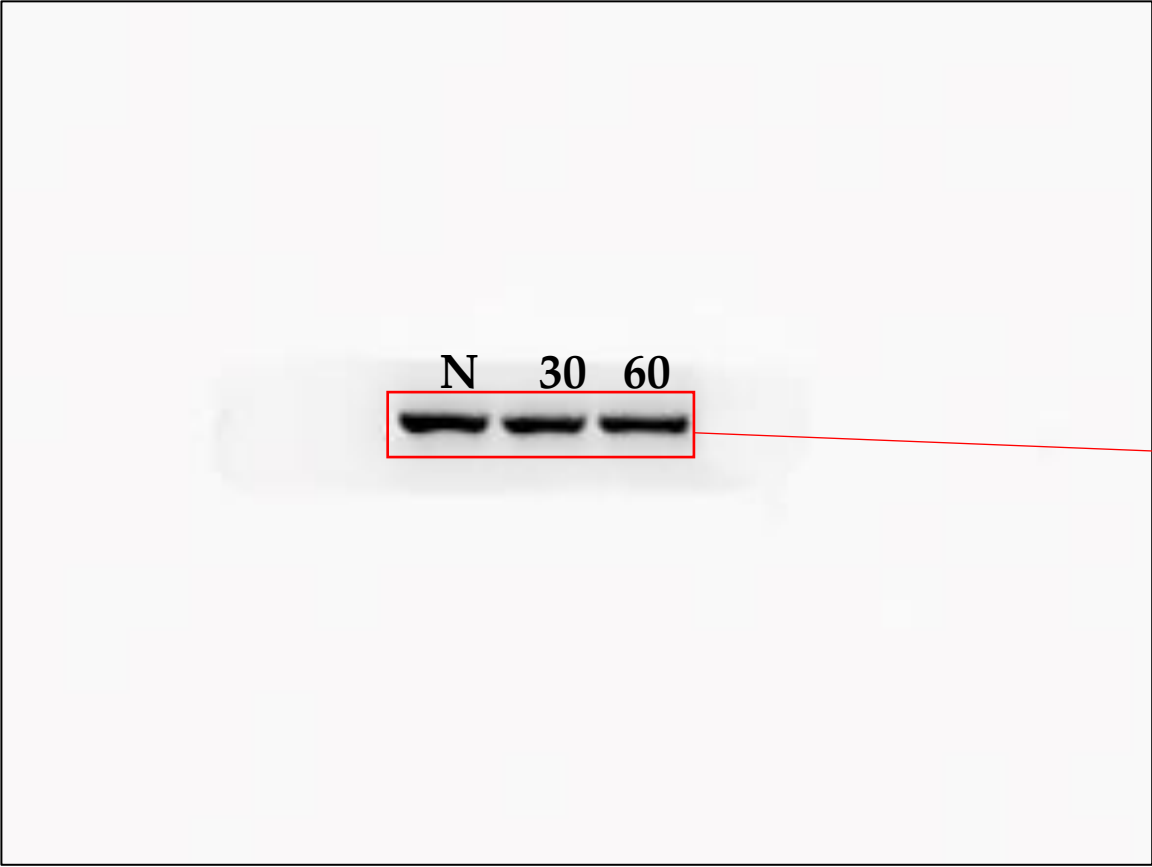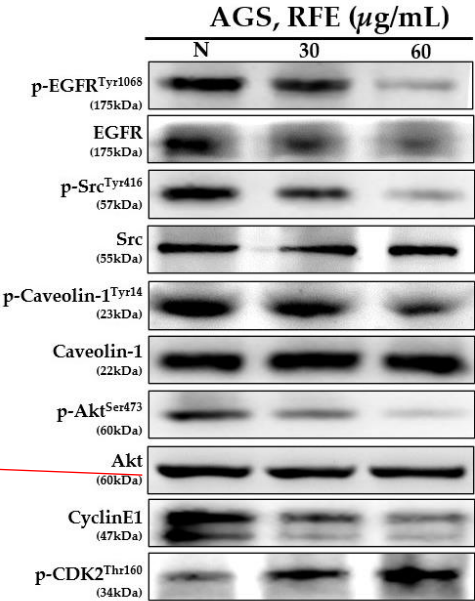

Full unedited gel for Figure S4A

CyclinE1

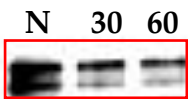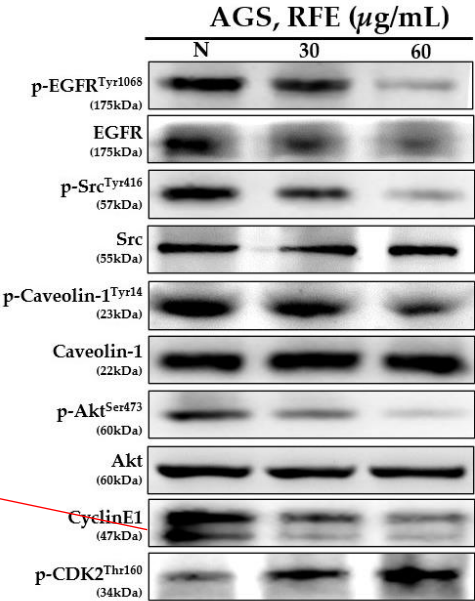

Full unedited gel for Figure S4A

**p-CDK2**

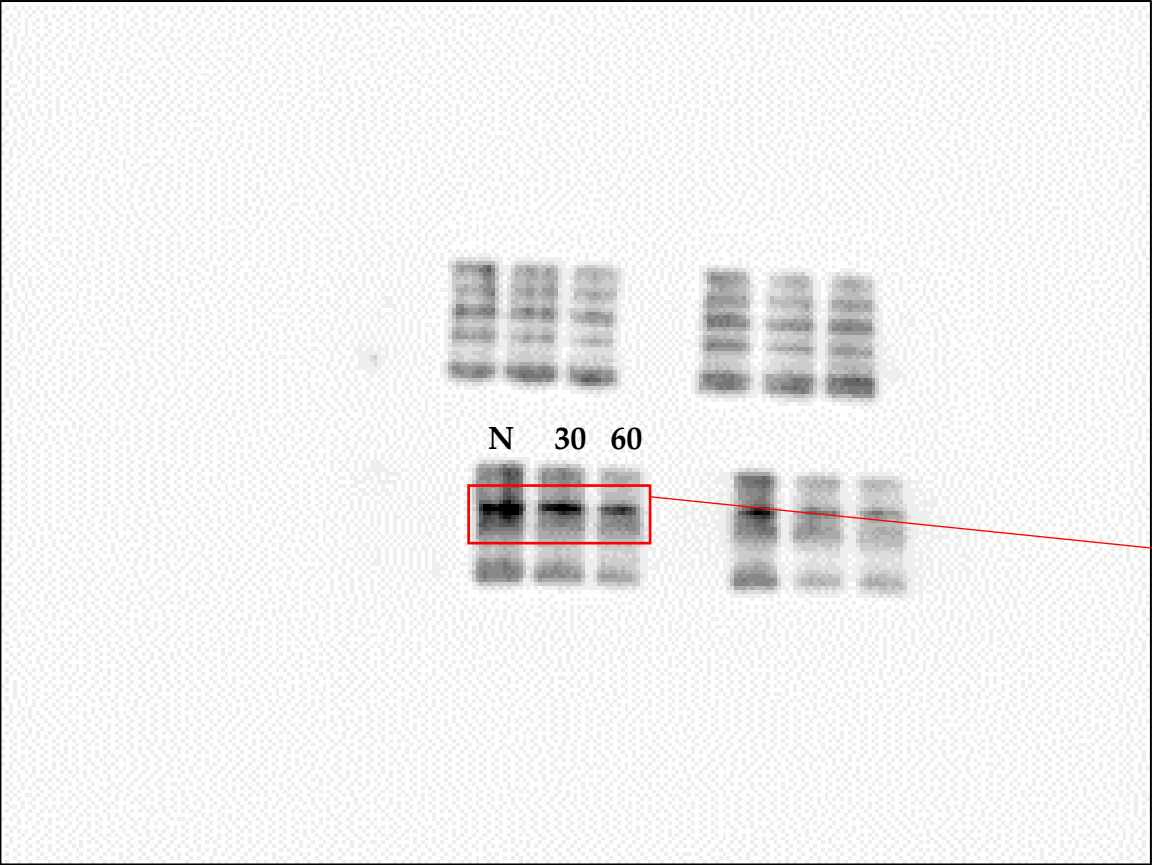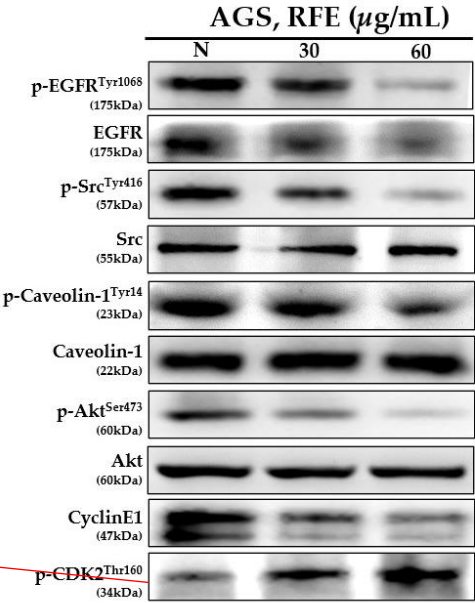

Full unedited gel for Figure S4A

p-MDM2

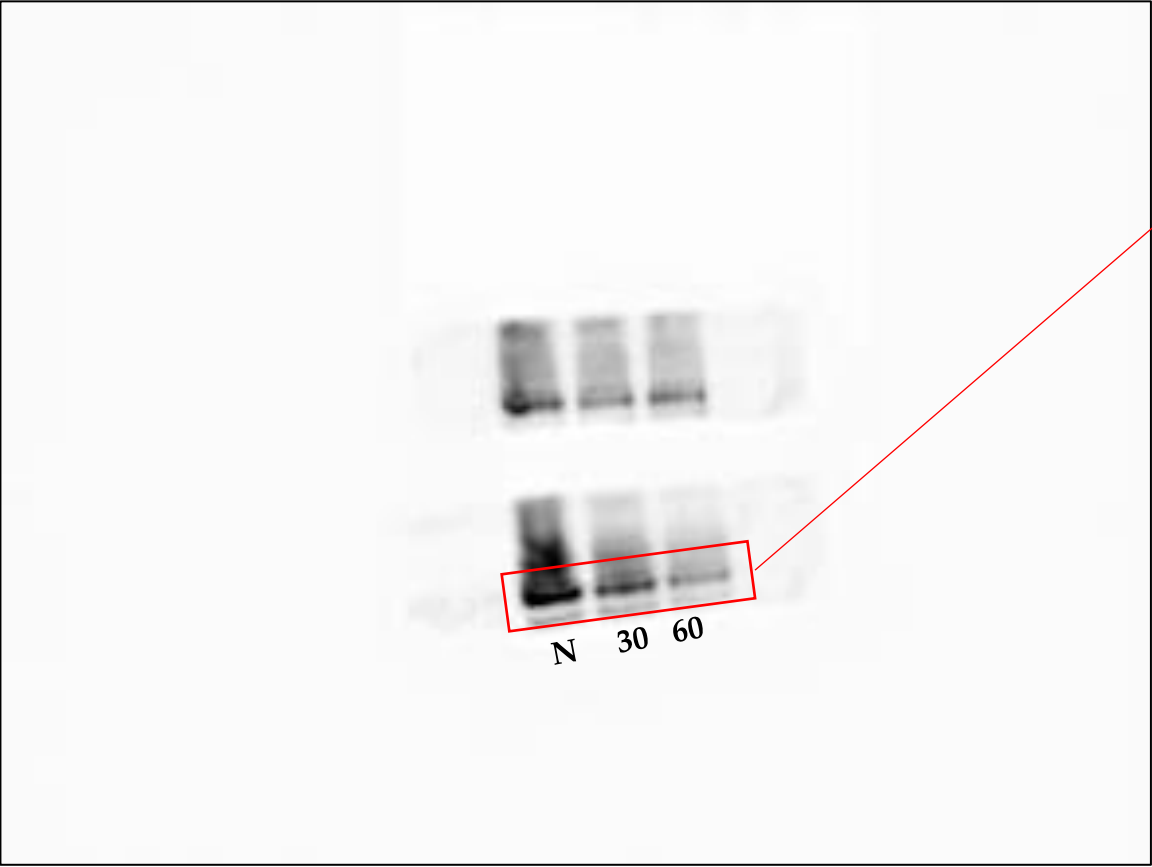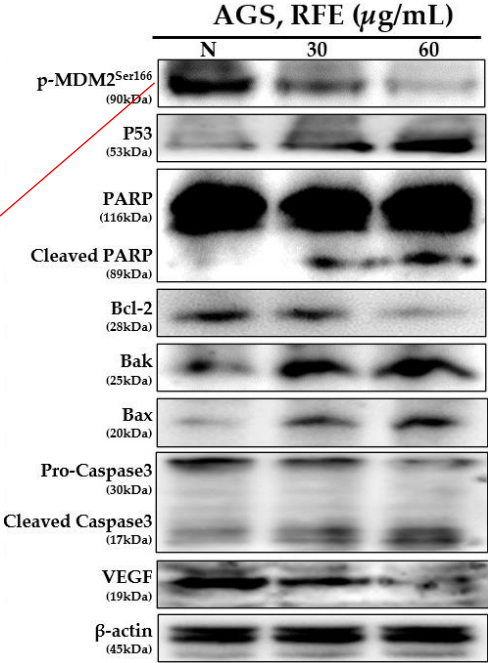

Full unedited gel for Figure S4A

p53

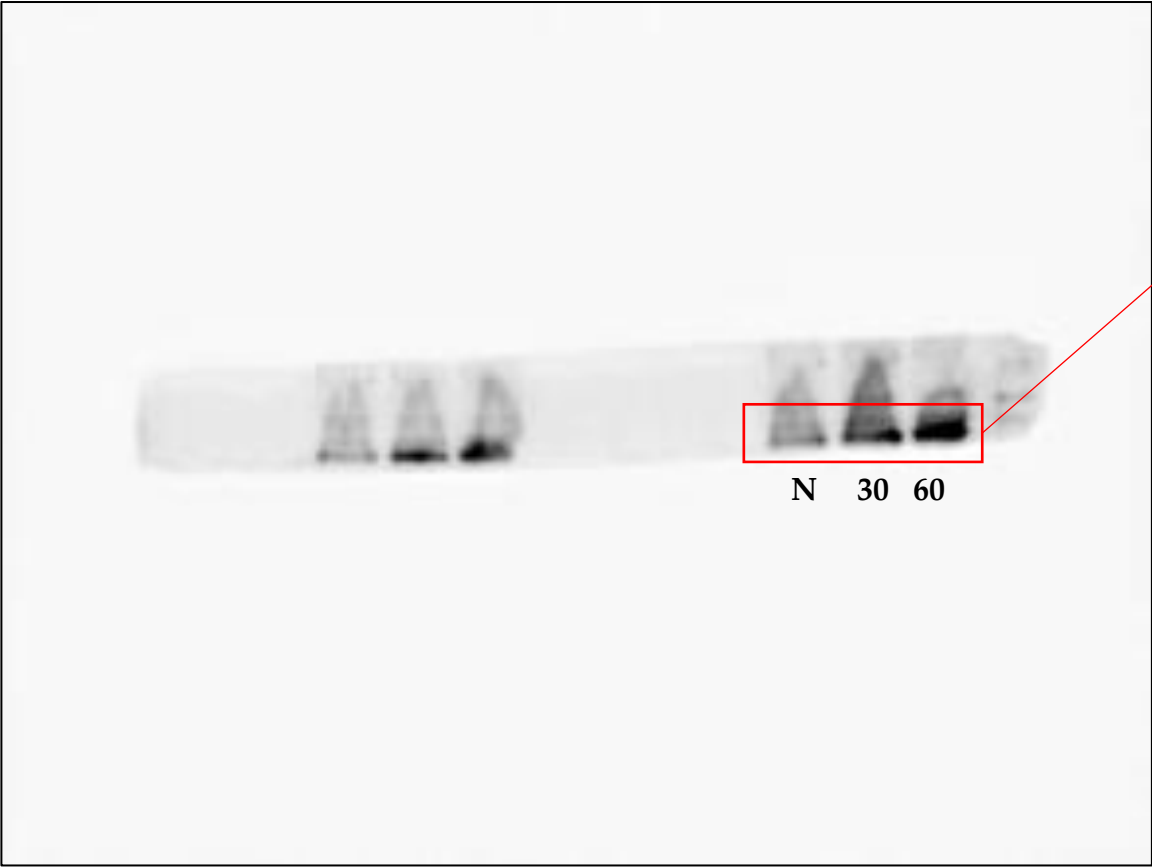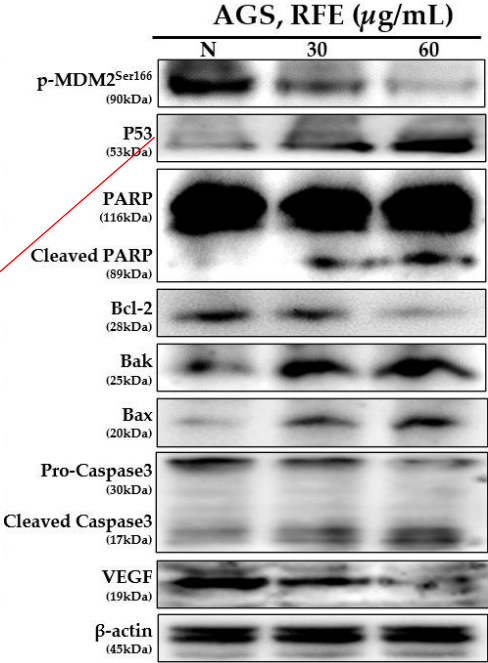

Full unedited gel for Figure S4A

**PARP**

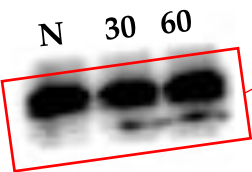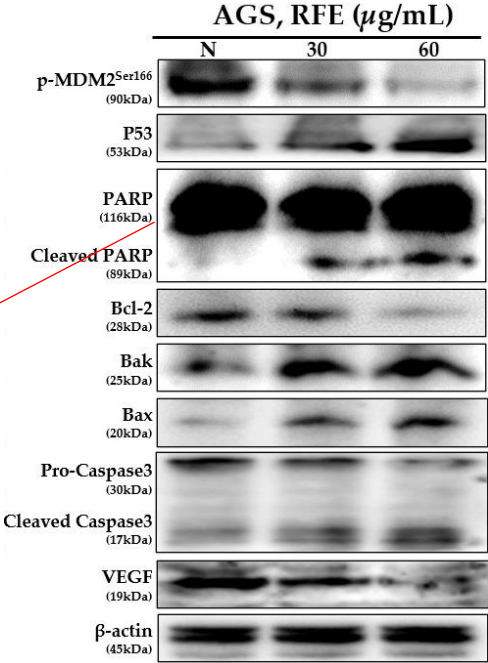

Full unedited gel for Figure S4A

**Bcl-2**

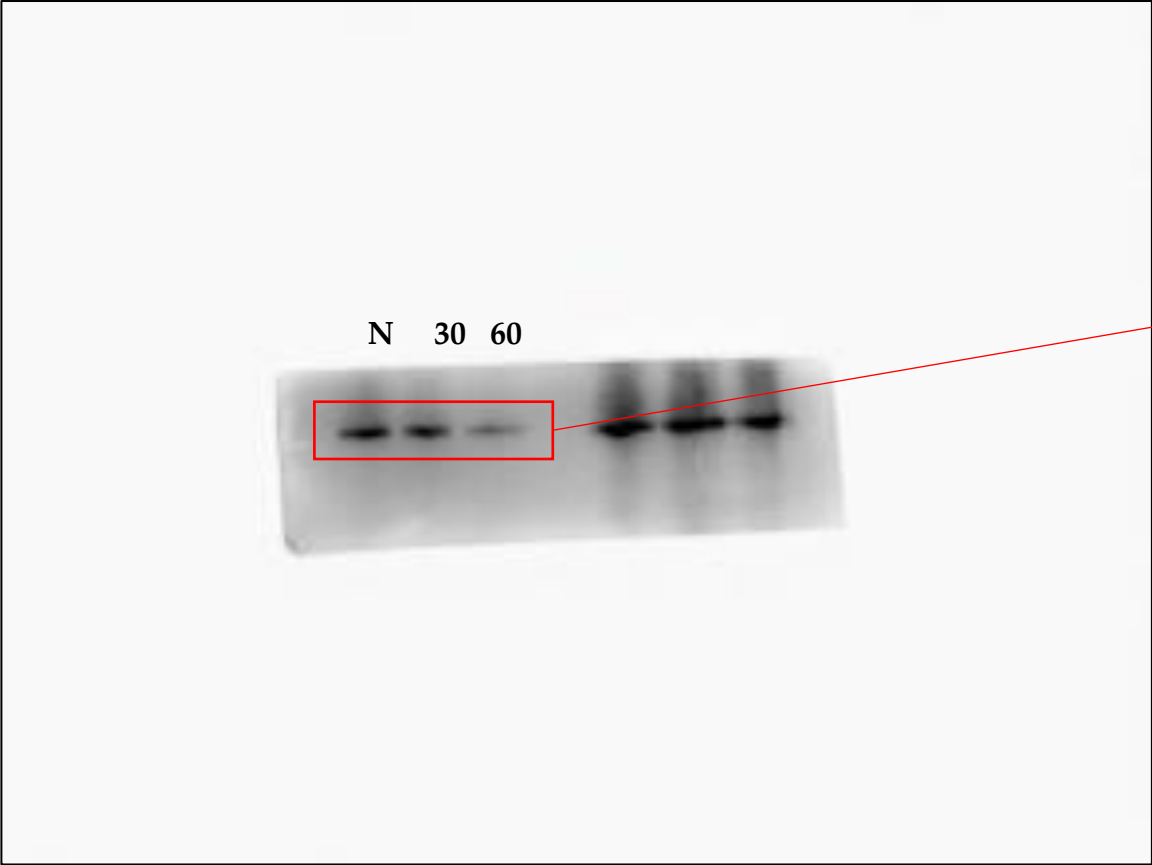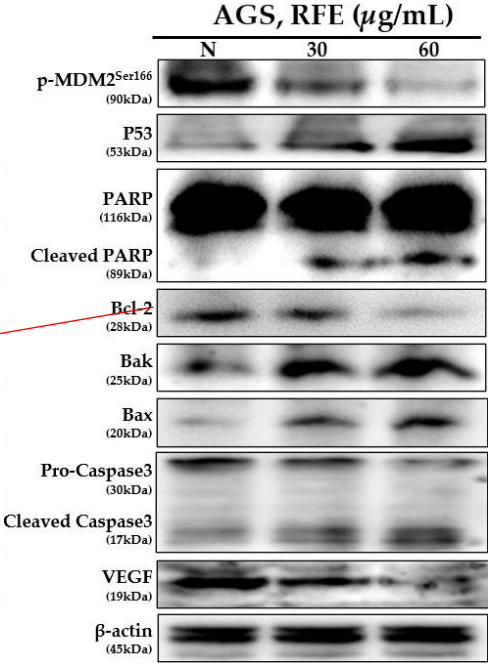



Full unedited gel for Figure S4A

**Bak**

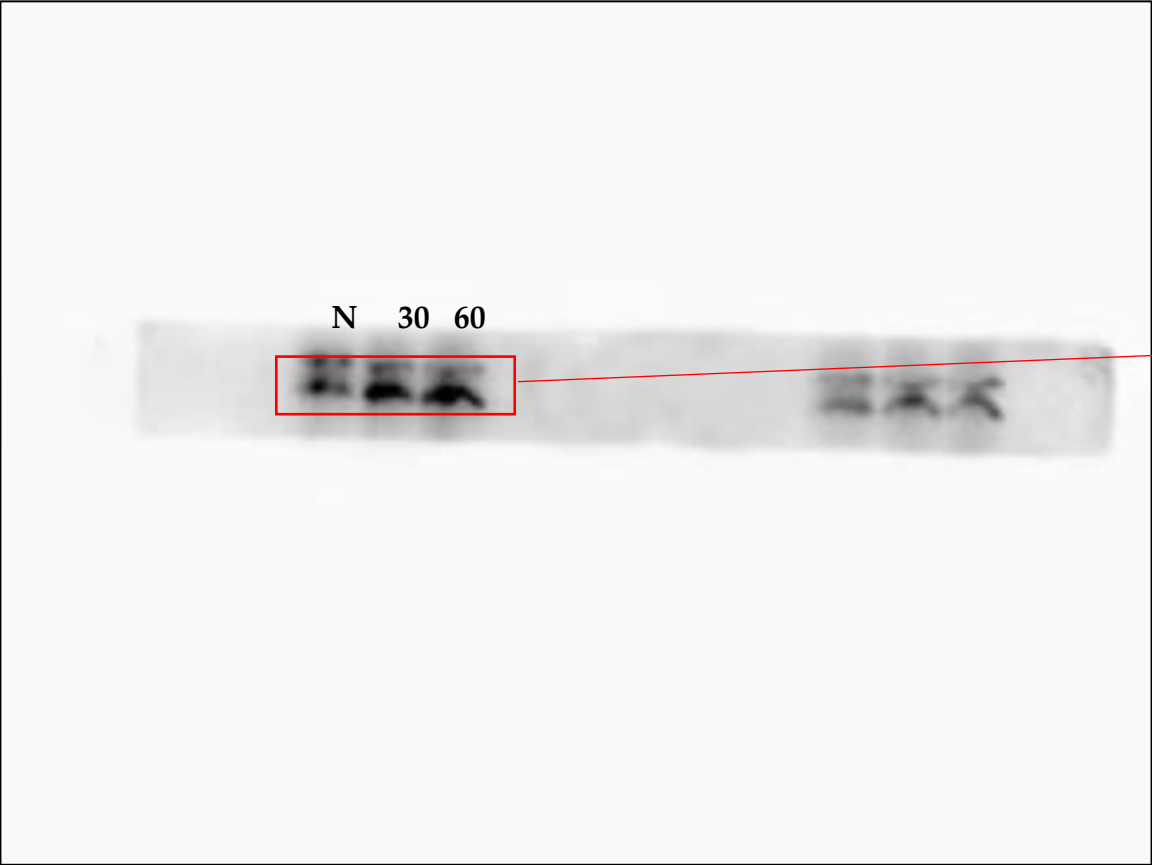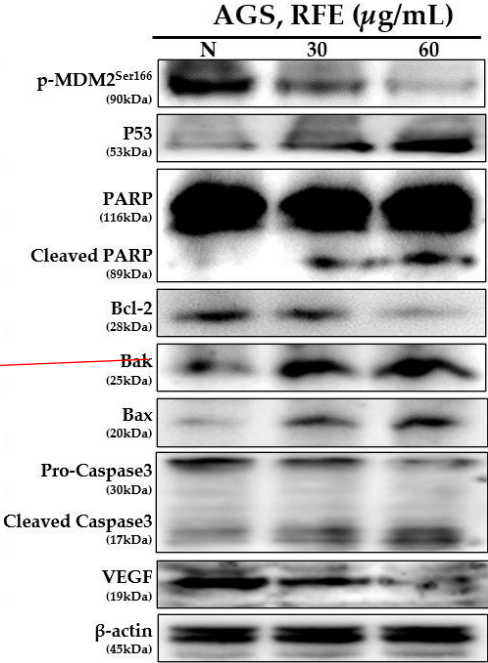

# Full unedited gel for Figure S4A

## Bax

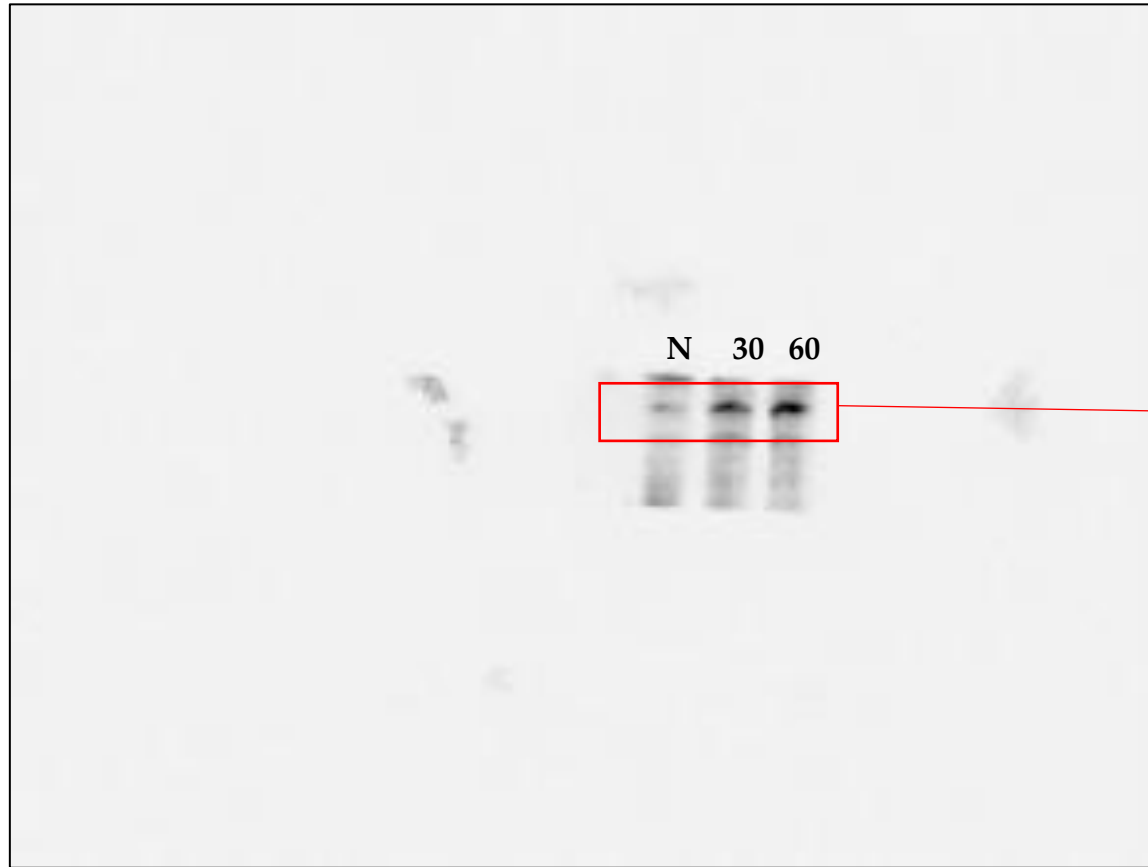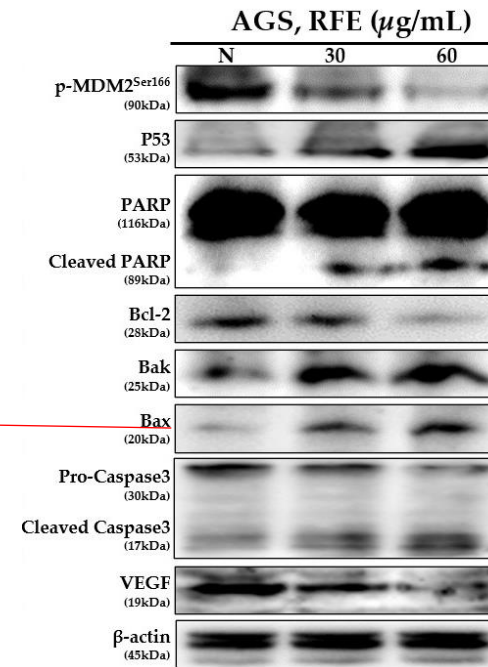

# Full unedited gel for Figure S4A

## aspase3

N 30 60

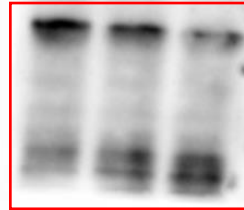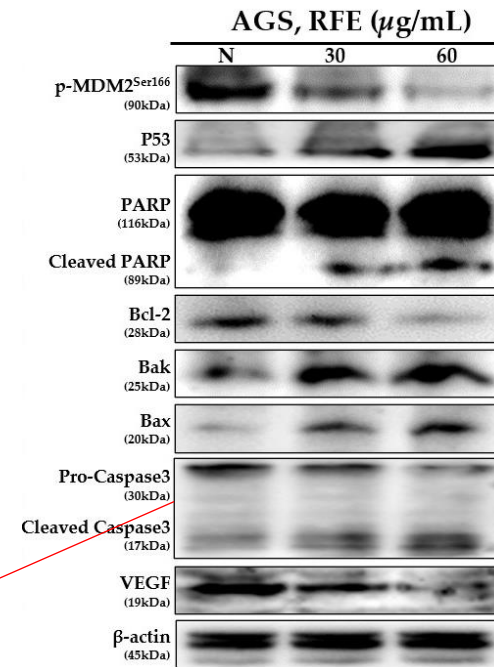

Full unedited gel for Figure S4A

VEGF

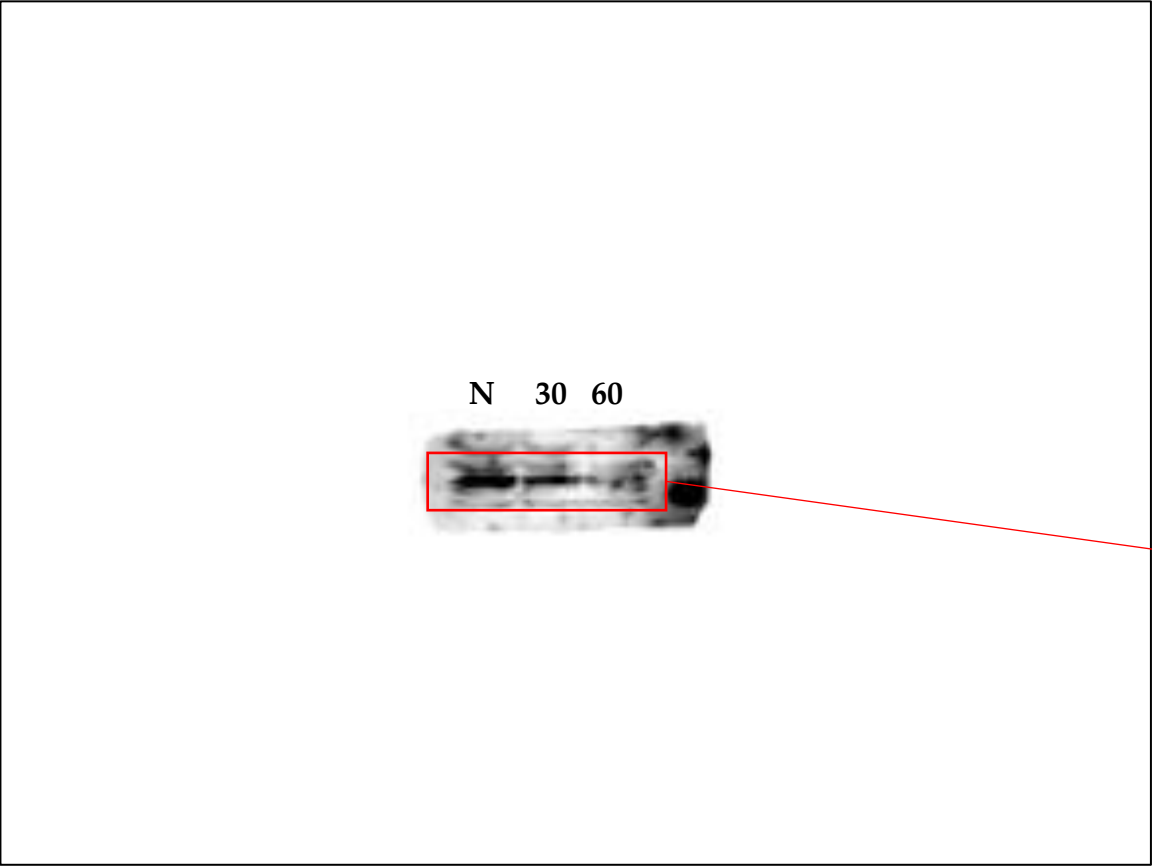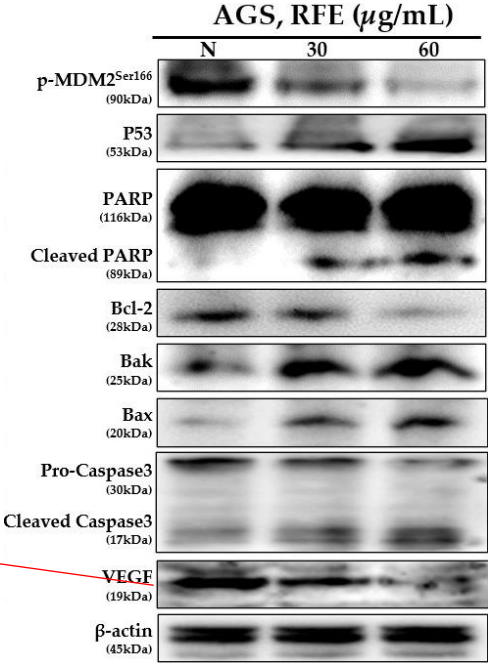

Full unedited gel for Figure S4A

VEGF

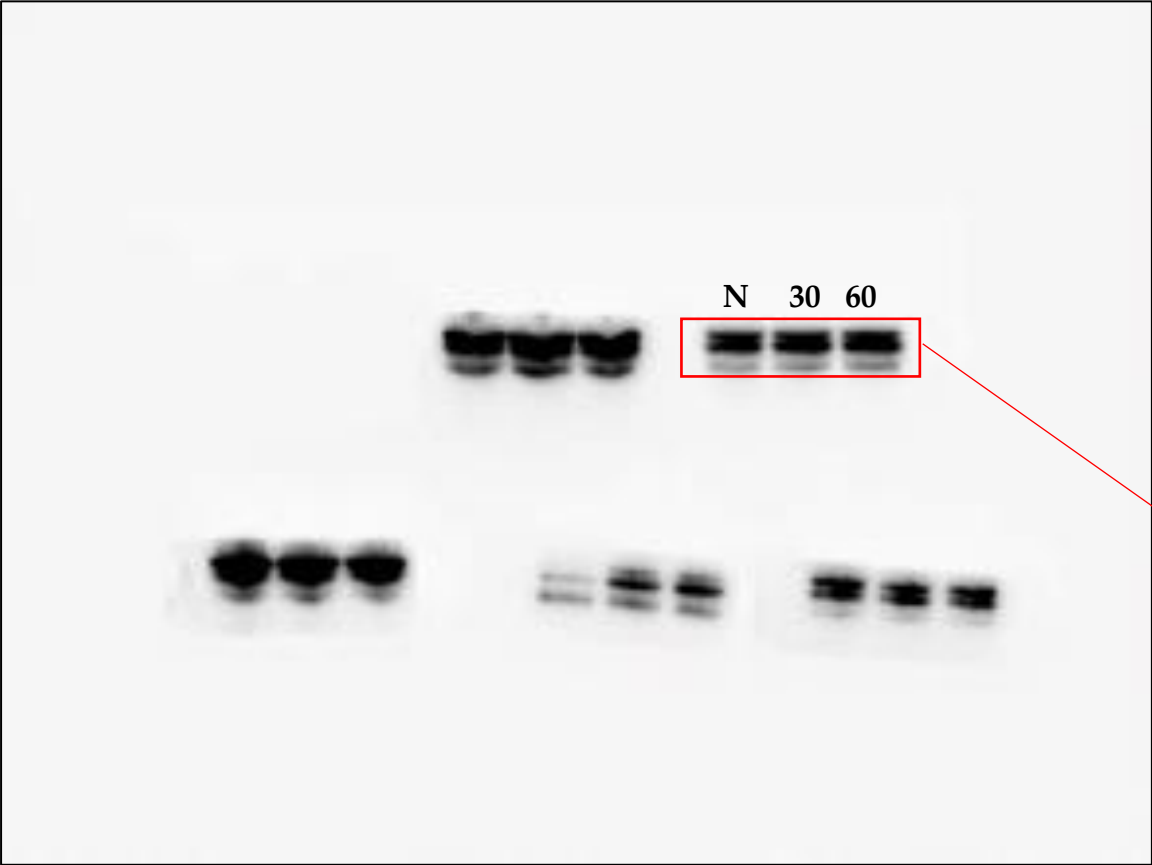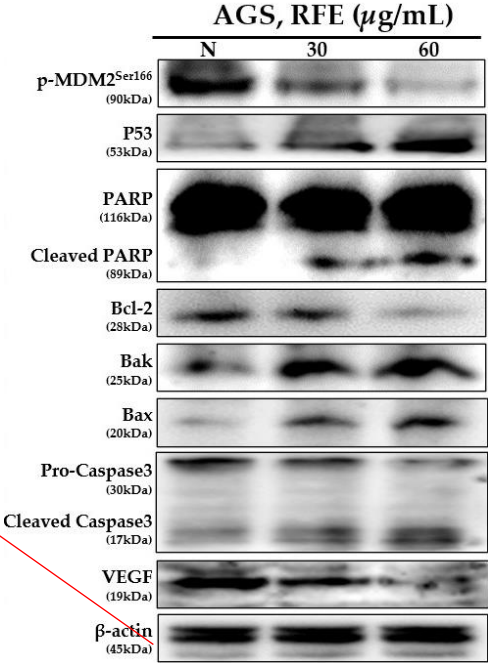

Second, this is the original picture of Western blotting results when cells were treated with Pifithrin- $\alpha$  (PFT), *Ribes fasciculatum* Extract (RFE), and both(+).

Full unedited gel for Figure S5C

**p-EGFR**

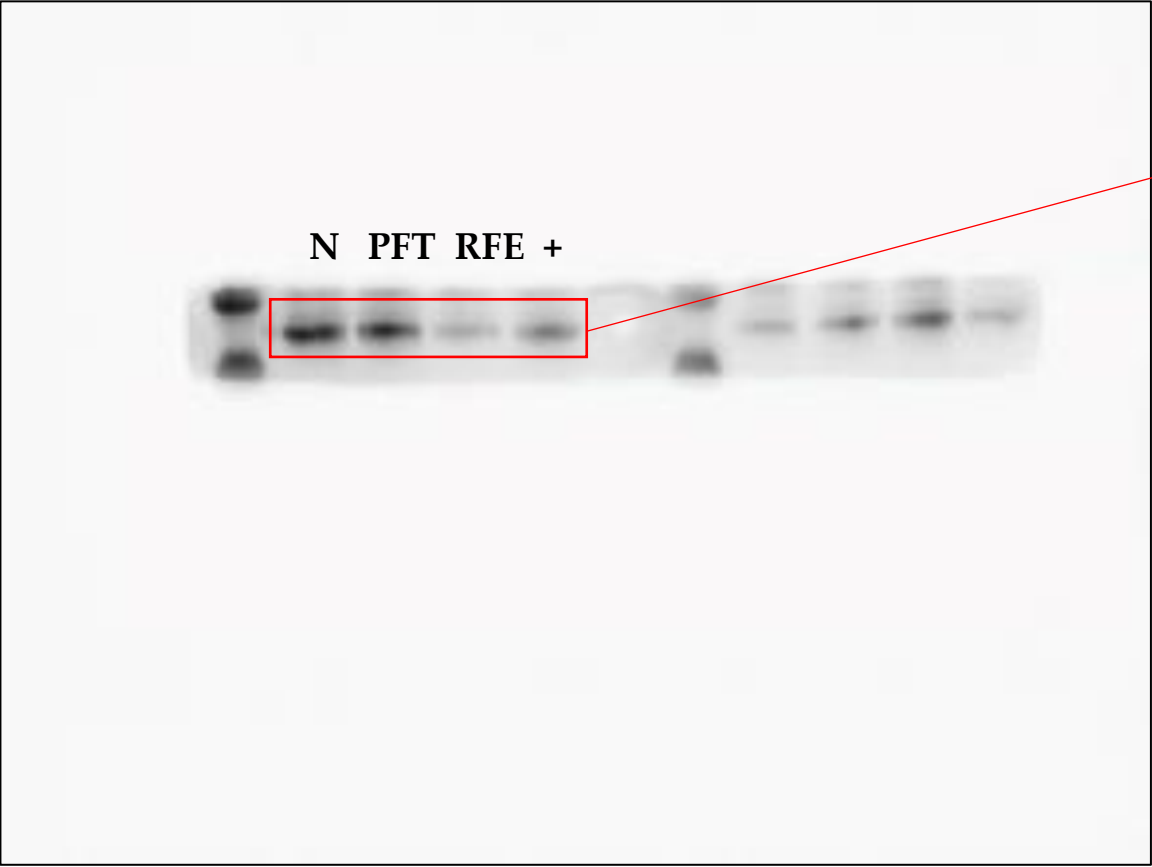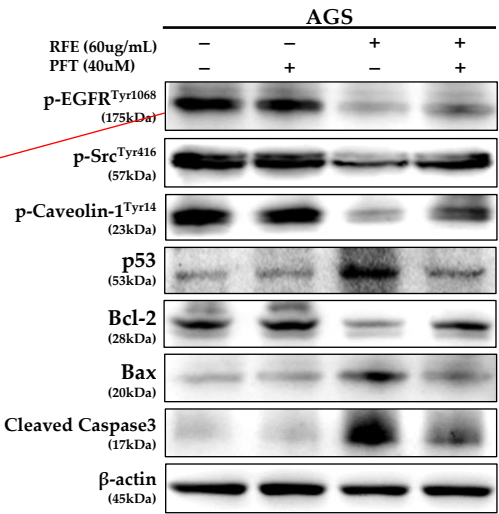

Full unedited gel for Figure S5C

**p-Src**

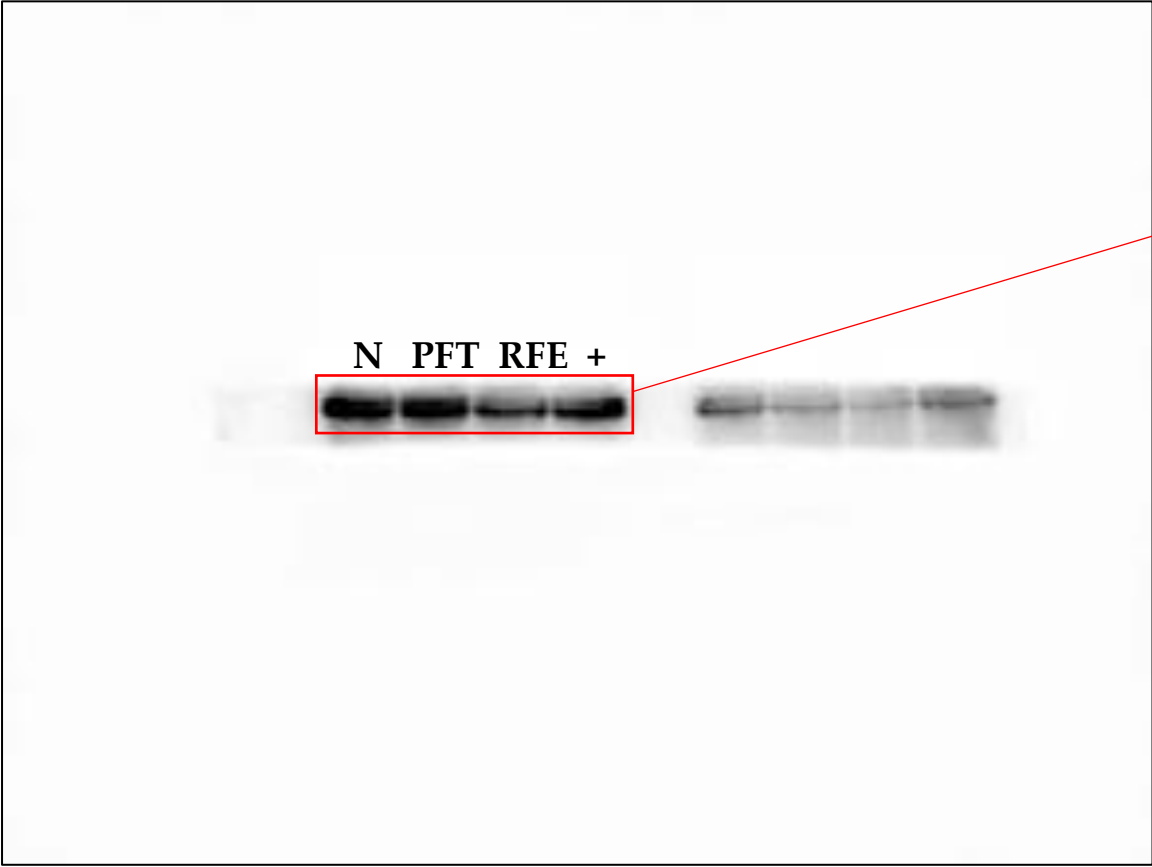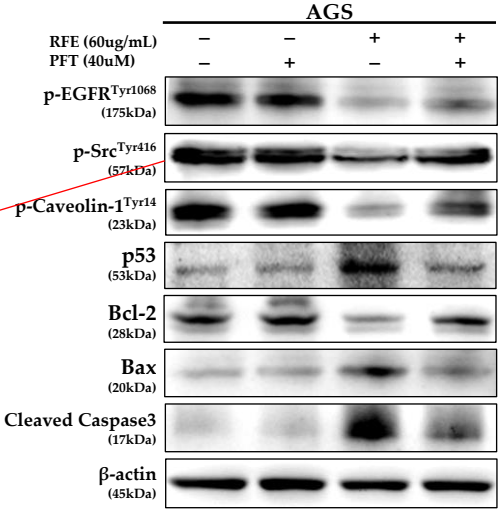



Full unedited gel for Figure S5C

**p-Caveolin-1**

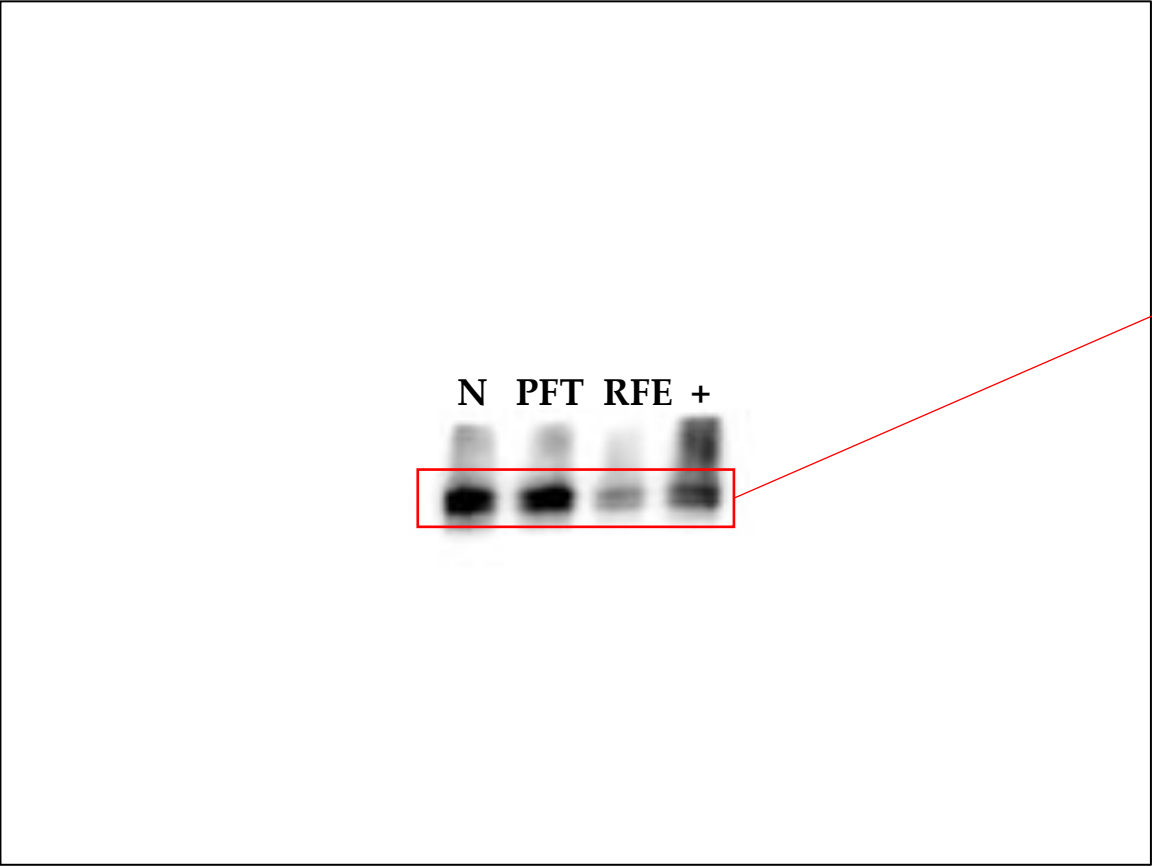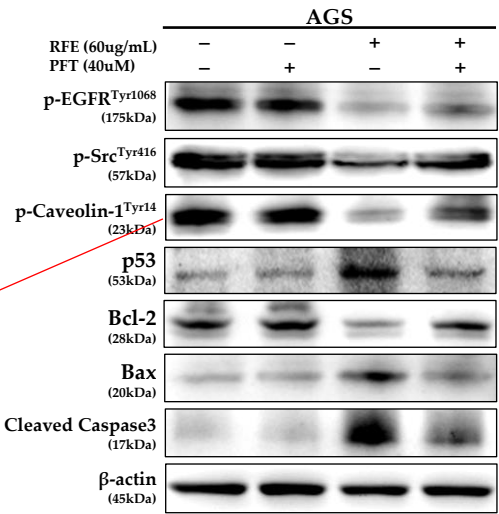

Full unedited gel for Figure S5C

**p-53**

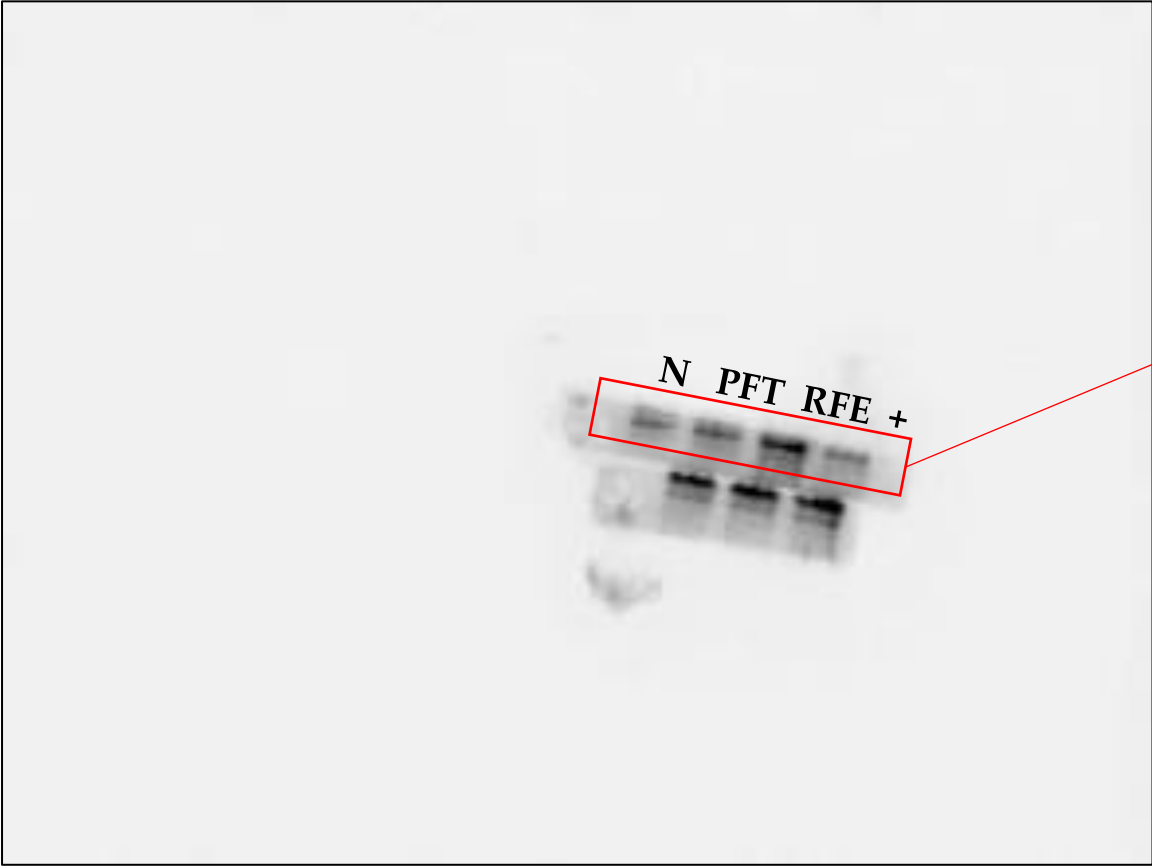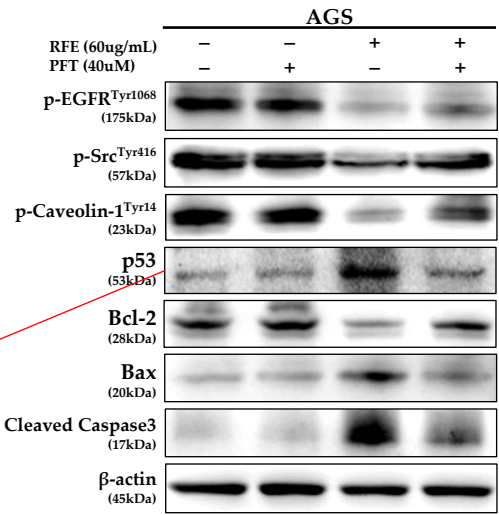

Full unedited gel for Figure S5C

**Bcl2**

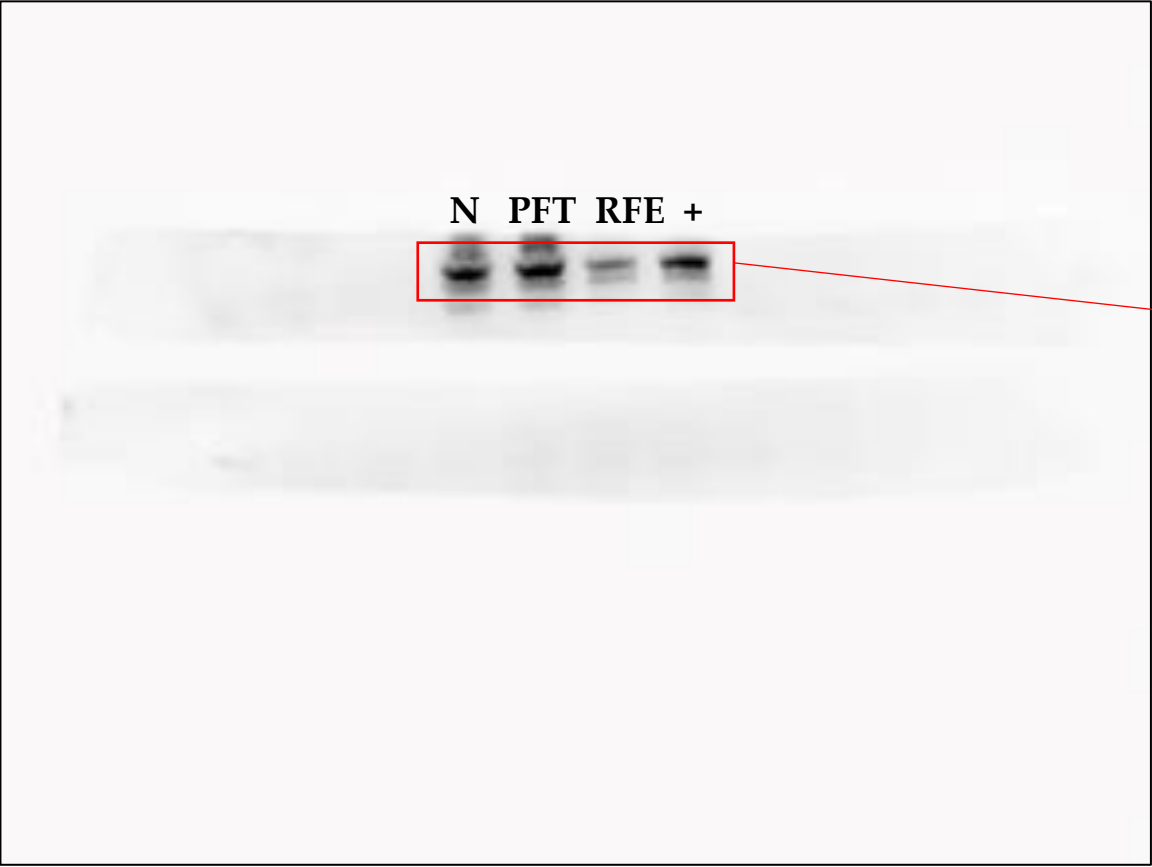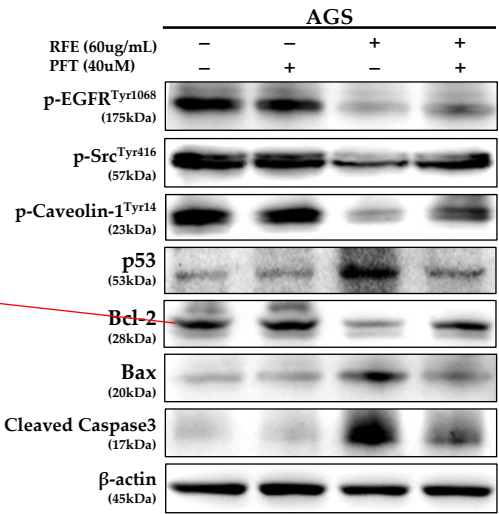

Full unedited gel for Figure S5C

**Bax**

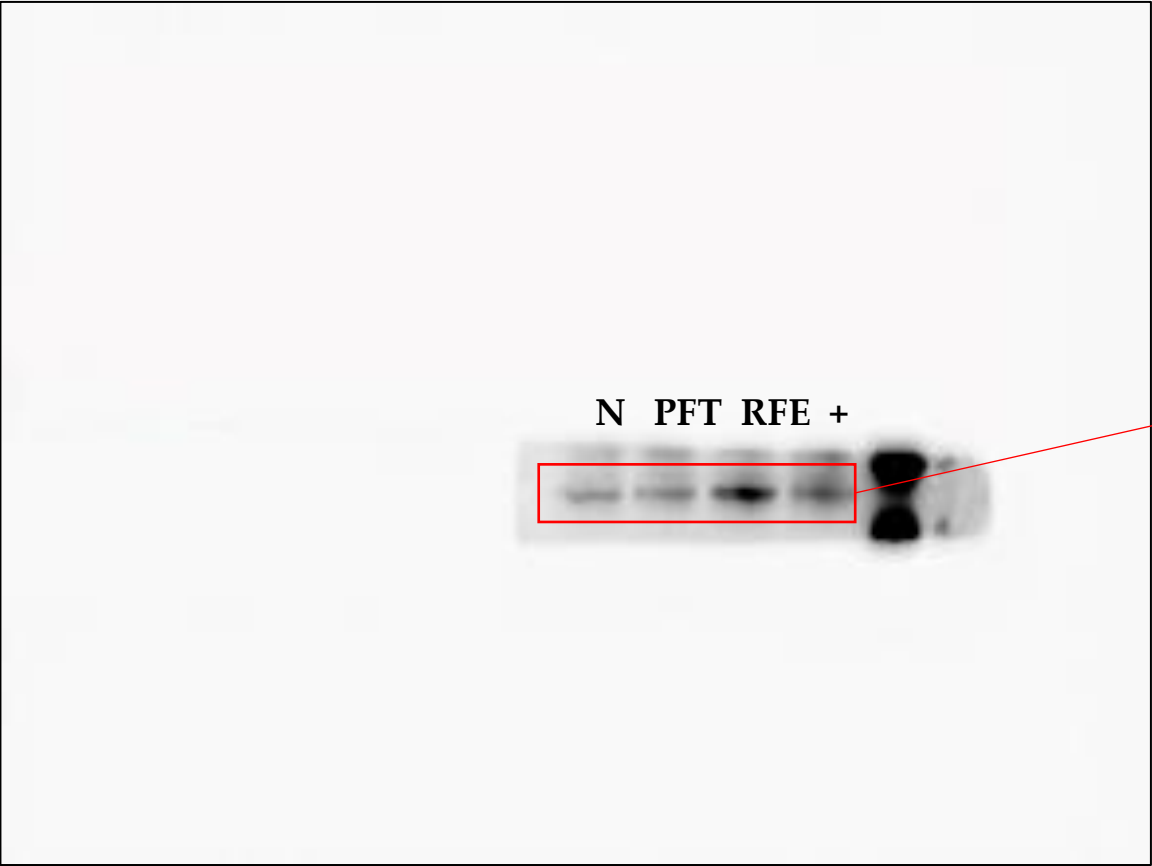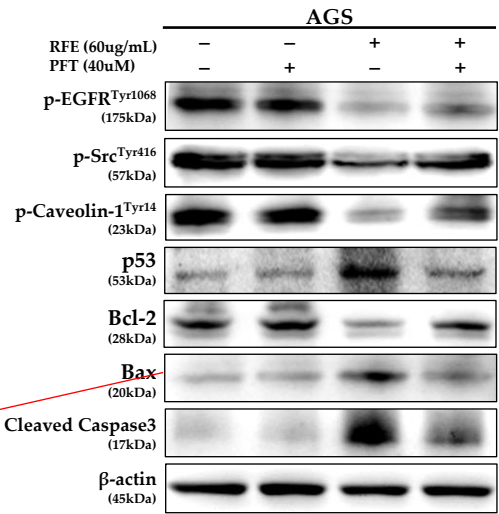

Full unedited gel for Figure S5C

**Cleaved caspase3**

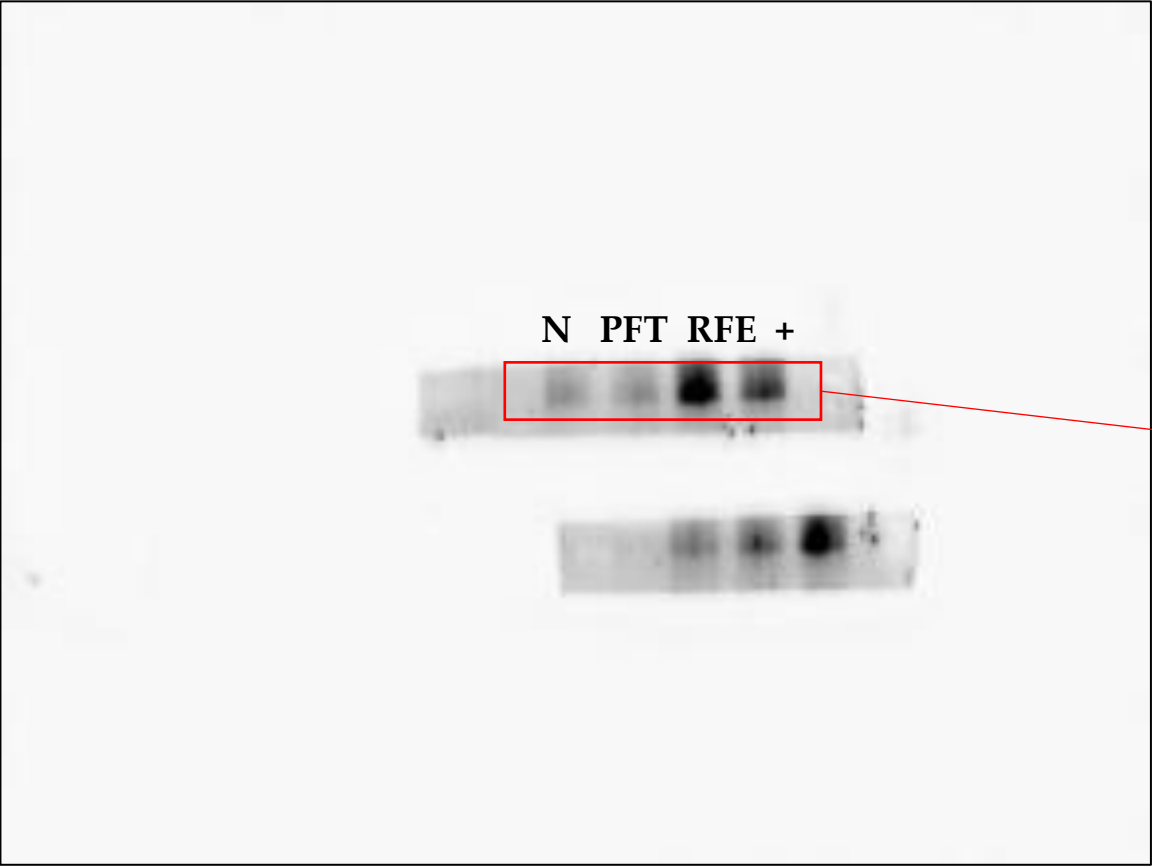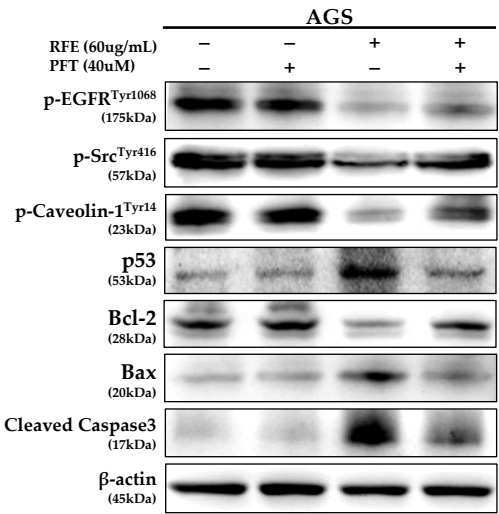

# Full unedited gel for Figure S5C

## Beta actin

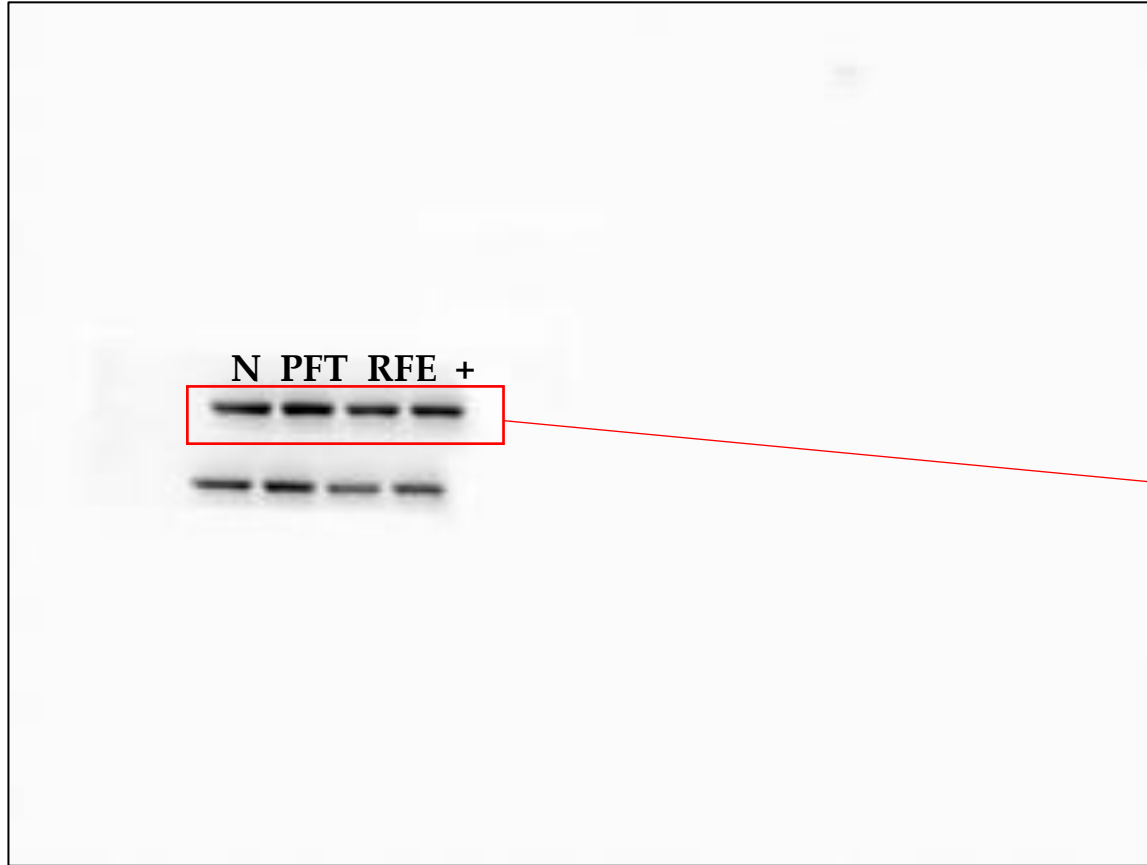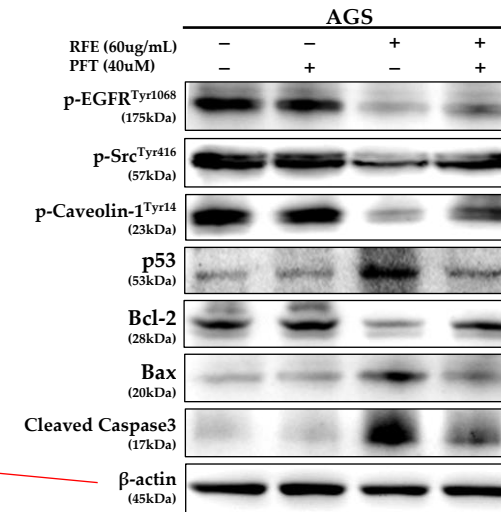

Supplement: s1 [file s1]
